# Supplementary material for: Chemical Precursors to Wintertime Carbonyl and Ozone Formation
Source: Copernicus journal article supplement (doi:10.5194/egusphere-2025-3845), 2025-12-04
Supplement: Supplementary file 1 [file egusphere-2025-3845-supplement.pdf]

## Supporting Information

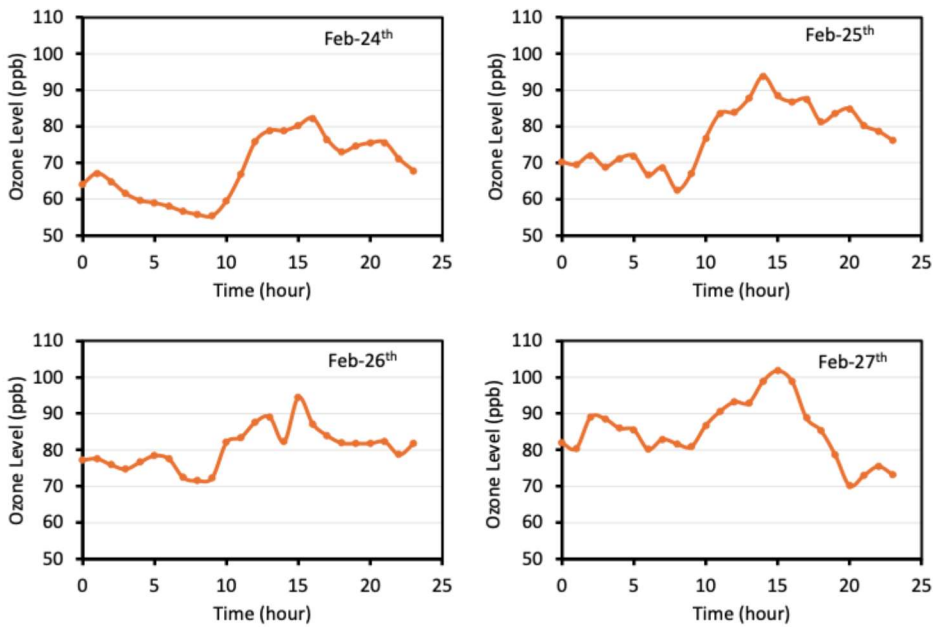

Figure S1: Diurnal variation of hourly average ozone levels during the simulation period (February 24–27, 2019).

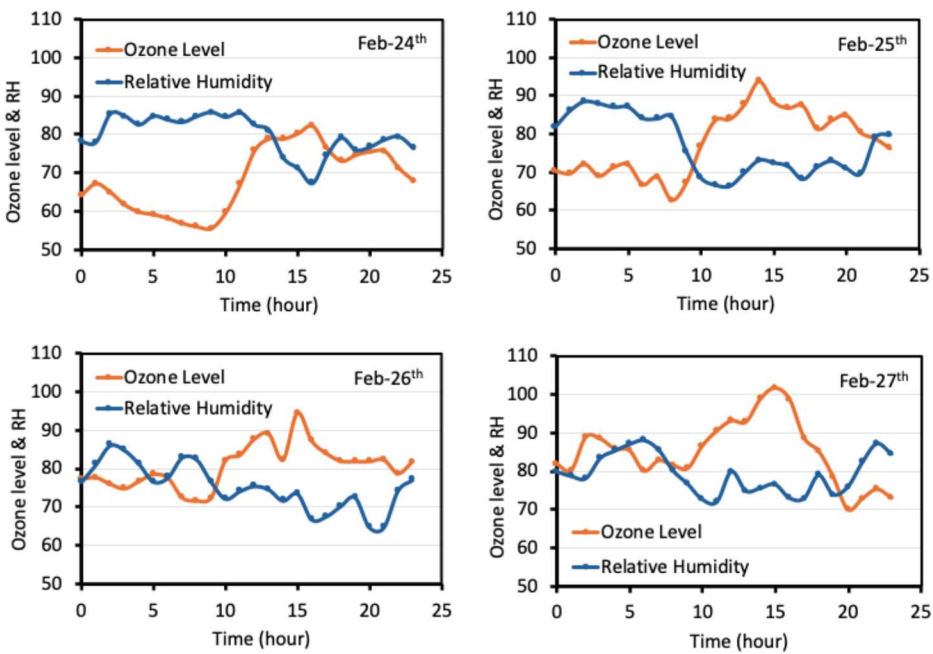

Figure S2: Diurnal trend of ozone level vs relative humidity (RH) during the simulation period.

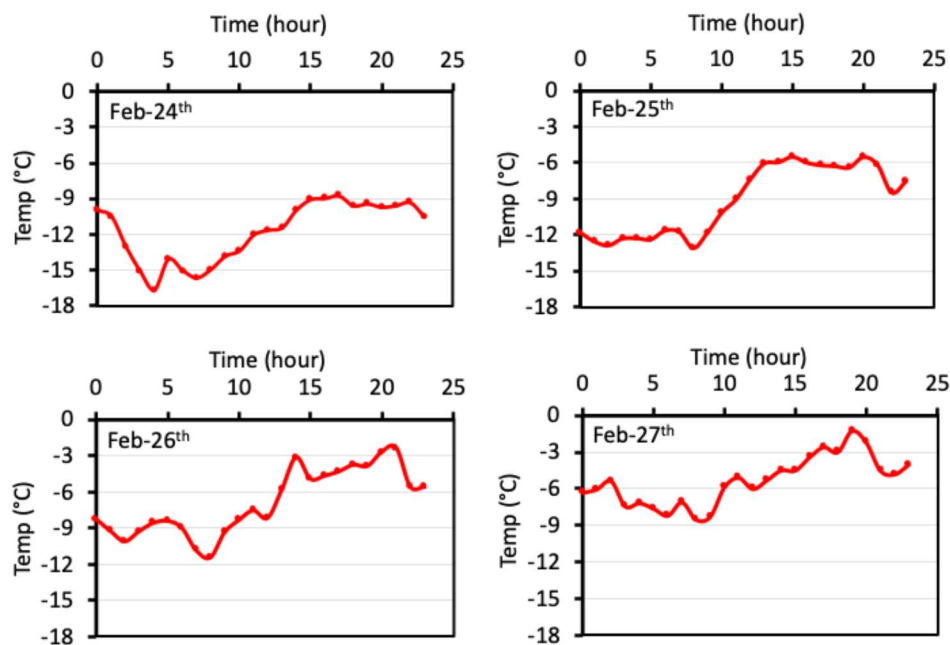

Figure S3: Diurnal trend of atmospheric temperature during the simulation period.

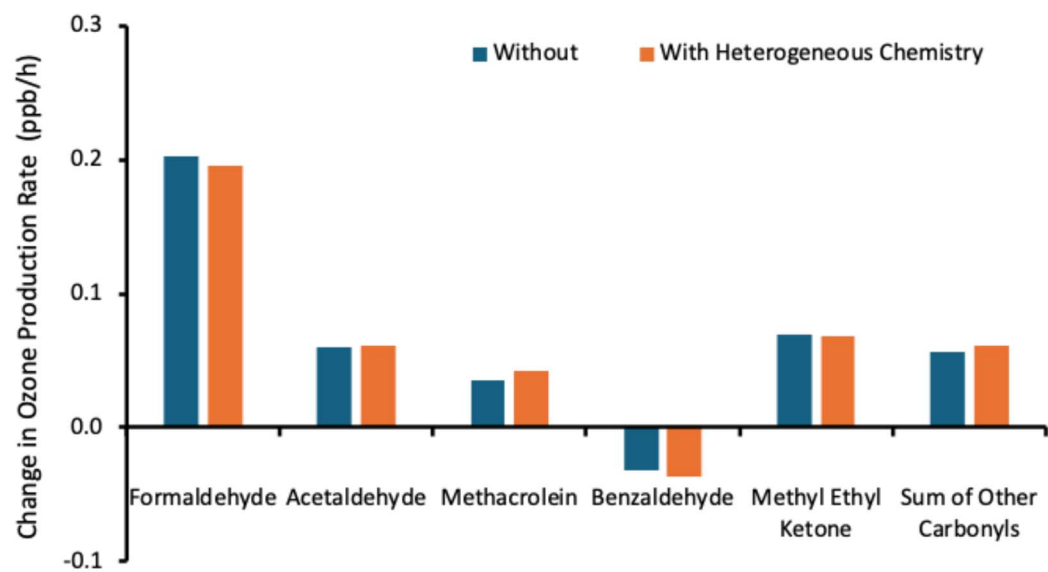

Figure S4: Impacts of specific carbonyl compounds on winter ozone production rates simulated by the F0AM box model with MCMv331, considering scenarios with and without heterogeneous chemistry. Bars represent the changes in ozone production rate resulting from a 50% increase in the mixing ratio of each NMOC group.

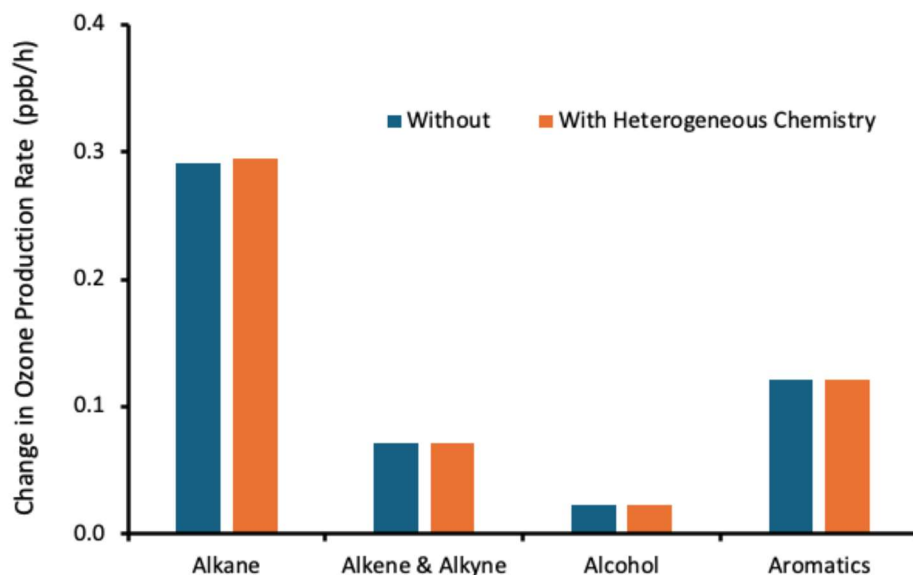

Figure S5: Impacts of the changes in NMOC precursor groups on winter O<sub>3</sub> production rates simulated by the F0AM box model with MCMv331, considering scenarios with and without heterogeneous chemistry. Bars represent the changes in O<sub>3</sub> production rate resulting from a 50% increase in the mixing ratio of each NMOC group.

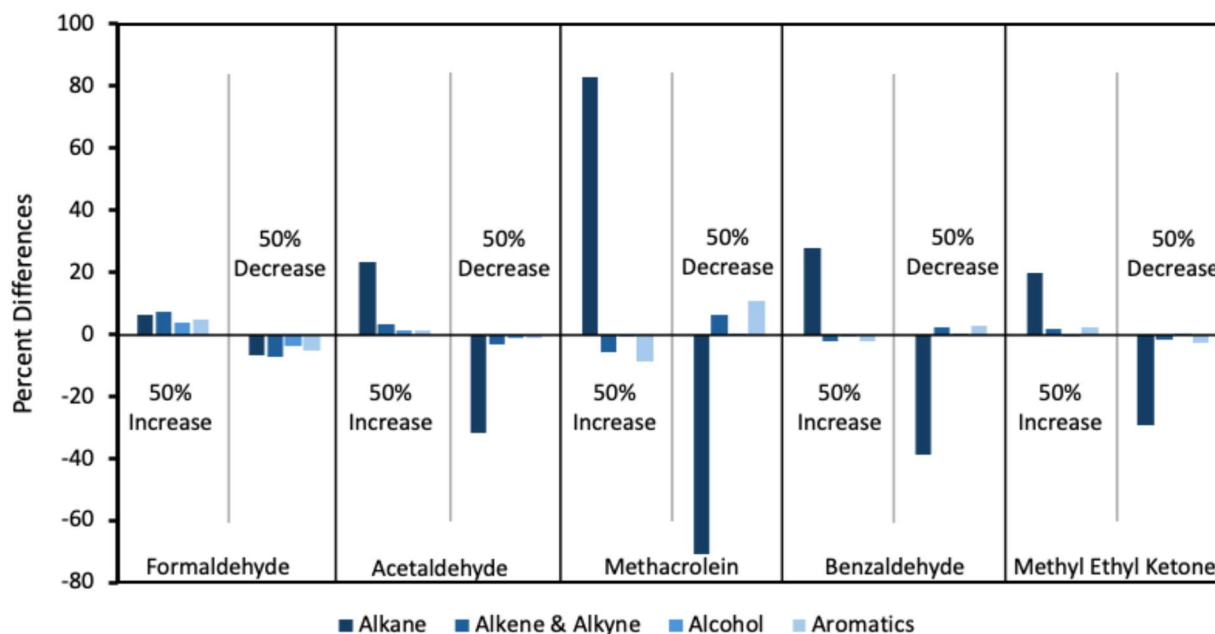

Figure S6: Sensitivity of carbonyl compounds to changes in NMOC precursor groups (MCMv331 Output). Bars represent the changes in carbonyl mixing ratios resulting from a  $\pm 50\%$  change in the mixing ratio of each NMOC group.

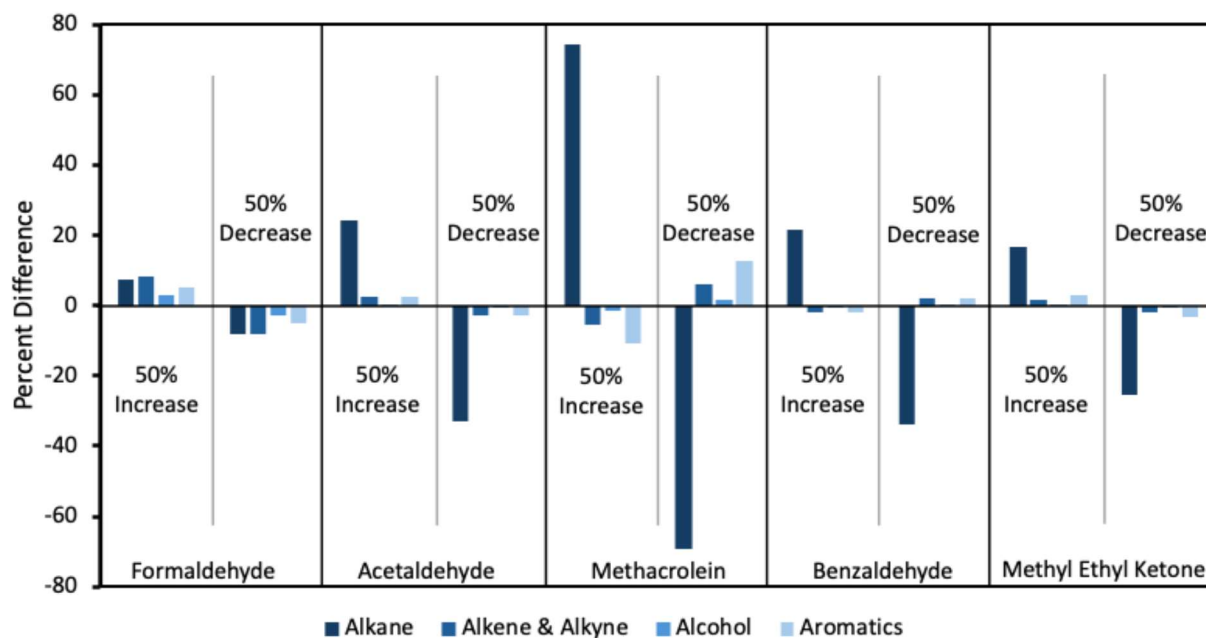

Figure S7: Sensitivity of carbonyl compounds to changes in NMO precursor groups (SAPRC07 Output). Bars represent the changes in carbonyl mixing ratios resulting from a  $\pm 50\%$  change in the mixing ratio of each NMO group.

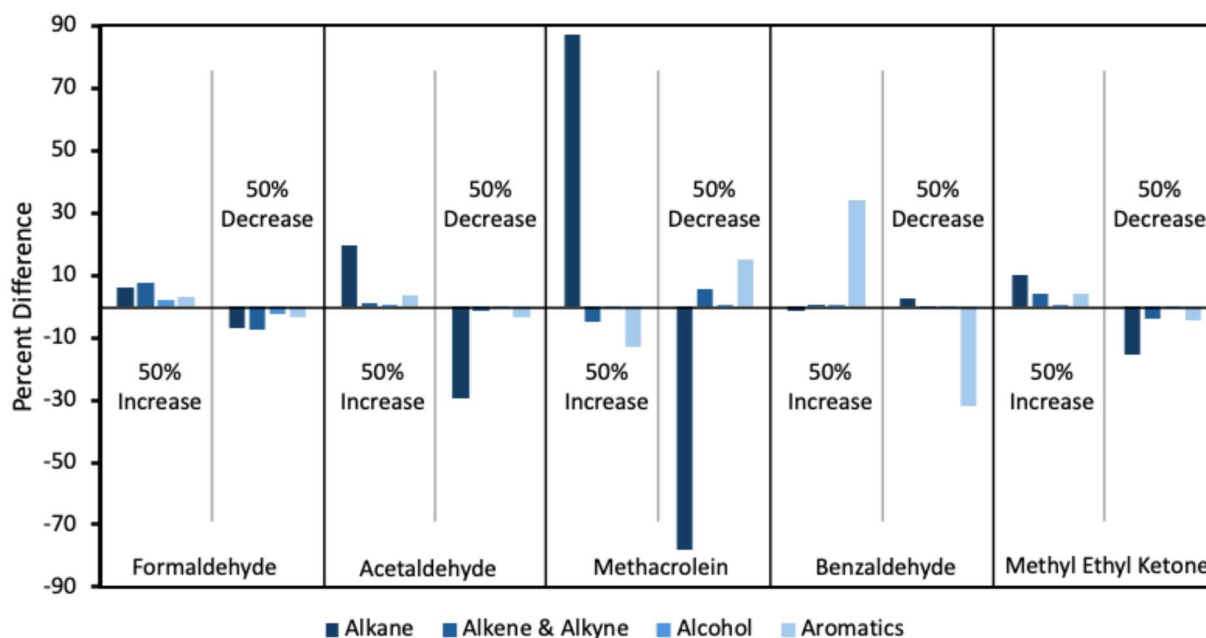

Figure S8: Sensitivity of carbonyl compounds to changes in NMO precursor groups (RACM2 Output). Bars represent the changes in carbonyl mixing ratios resulting from a  $\pm 50\%$  change in the mixing ratio of each NMO group.

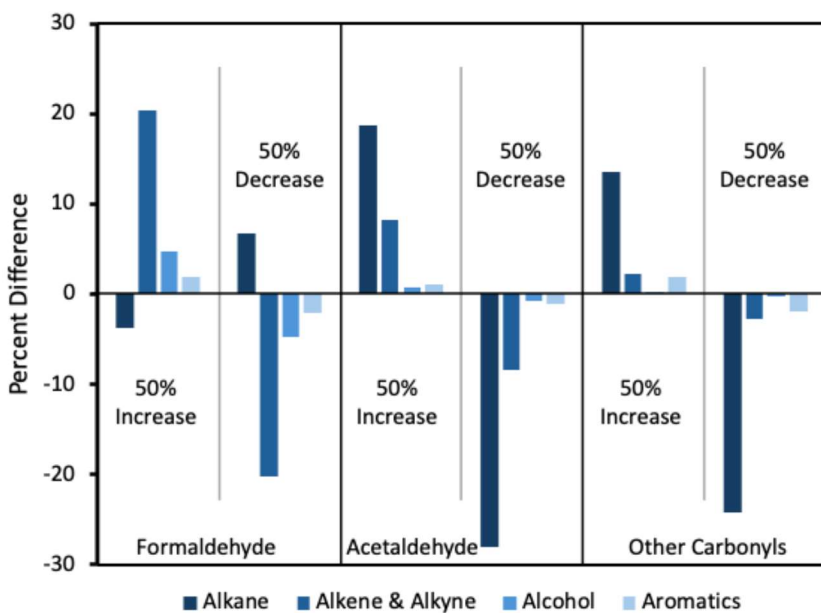

Figure S9: Sensitivity of carbonyl compounds to changes in NMO precursor groups (CB6 Output). Bars represent the changes in carbonyl mixing ratios resulting from a  $\pm 50\%$  change in the mixing ratio of each NMO group.

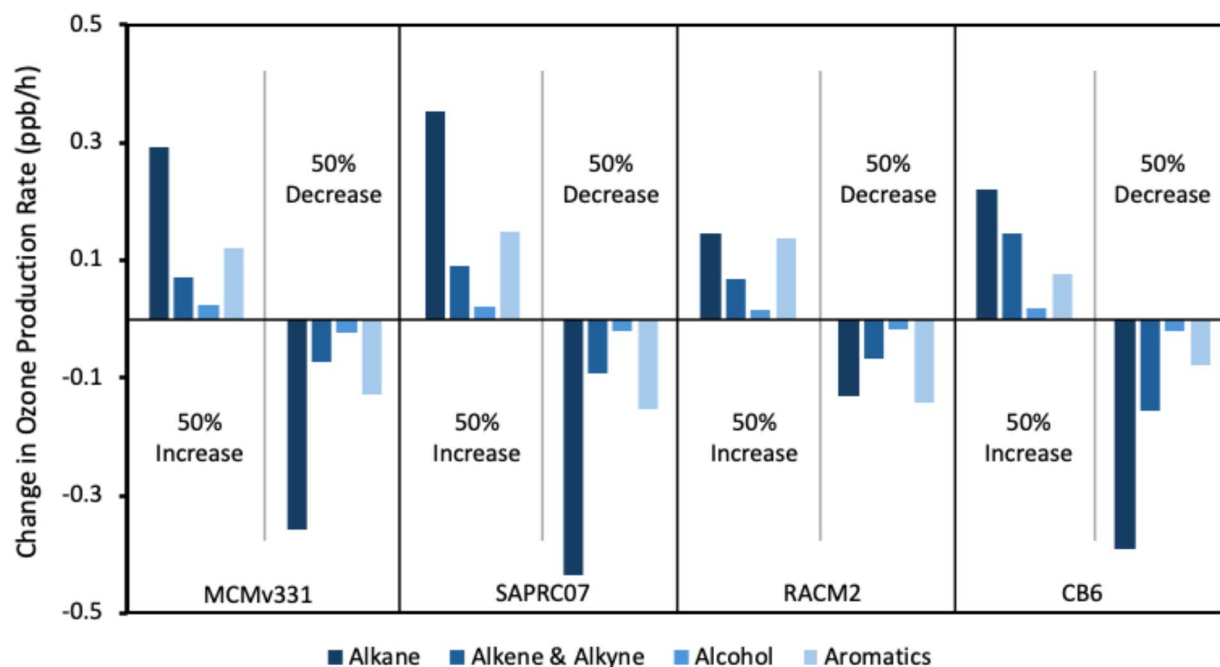

Figure S10: Sensitivity of  $O_3$  production rate to changes in NMO precursor groups within different chemical mechanisms (MCMv331, SAPRC07, RACM2 & CB6). The bars represent the changes in  $O_3$  production rate due to increase & decrease in NMO mixing ratio of 50%.

**Table S1: Initial and maximum mixing ratio at day 4<sup>th</sup> of carbonyl species with their emission flux according to MCMv331.**

| Carbonyl Species    | Initial Mixing Ratio (ppb) | Emission Flux (Molecules cm <sup>-2</sup> s <sup>-1</sup> ) | Max Mixing Ratio (ppb) at day four. |
|---------------------|----------------------------|-------------------------------------------------------------|-------------------------------------|
| Formaldehyde        | 0.9                        | 0.0                                                         | 1.4                                 |
| Acetaldehyde        | 0.6                        | 0.0                                                         | 2.2                                 |
| Propionaldehyde     | 0.0                        | 0.0                                                         | 0.6                                 |
| Butyraldehyde       | 0.4                        | 0.2                                                         | 0.5                                 |
| Valeraldehyde       | 0.0                        | 0.0                                                         | 0.0                                 |
| Acrolein            | 0.4                        | 0.2                                                         | 0.6                                 |
| Methacrolein        | 0.2                        | 0.2                                                         | 0.4                                 |
| Crotonaldehyde      | 0.0                        | 0.0                                                         | 0.0                                 |
| Benzaldehyde        | 1.6                        | 0.1                                                         | 1.8                                 |
| Acetone             | 0.7                        | 0.0                                                         | 4.7                                 |
| Methyl ethyl ketone | 0.2                        | 0.0                                                         | 1.6                                 |
| Cyclohexanone       | 0.0                        | 0.0                                                         | 0.3                                 |

**Table S2: Influence of ±50% changes in the initial mixing ratios of non-methane organic compounds (NMOC) on ozone (O<sub>3</sub>) production rates (MCMv331 Output), with ambient mixing ratios for relative importance.**

| NMOC Group | Species            | ΔO <sub>3</sub> Rate (+50% in NMOC) (ppb/h) | ΔO <sub>3</sub> Rate (-50% in NMOC) (ppb/h) | Mixing Ratio (ppb) |
|------------|--------------------|---------------------------------------------|---------------------------------------------|--------------------|
| Alkane     | Methane            | 0.043                                       | -0.044                                      | 4920.0             |
|            | Ethane             | 0.021                                       | -0.022                                      | 123.0              |
|            | Propane            | 0.027                                       | -0.027                                      | 63.0               |
|            | n-Butane           | 0.053                                       | -0.055                                      | 25.0               |
|            | Isobutane          | 0.084                                       | -0.088                                      | 15.0               |
|            | n-Pentane          | 0.022                                       | -0.022                                      | 10.0               |
|            | Isopentane         | 0.048                                       | -0.050                                      | 11.0               |
|            | n-Hexane           | 0.001                                       | 0.000                                       | 4.0                |
|            | 2-Methylpentane    | 0.017                                       | -0.017                                      | 3.0                |
|            | 3-Methylpentane    | 0.013                                       | -0.014                                      | 2.0                |
|            | 2,2-Dimethylbutane | 0.001                                       | -0.001                                      | 0.3                |
|            | 2,3-Dimethylbutane | 0.008                                       | -0.008                                      | 1.6                |
|            | n-Heptane          | -0.007                                      | 0.008                                       | 1.9                |
|            | 2-Methylhexane     | 0.001                                       | -0.001                                      | 0.8                |
|            | 3-Methylhexane     | 0.001                                       | -0.001                                      | 1.2                |
|            | n-Octane           | -0.007                                      | 0.007                                       | 0.8                |

|                  |                        |        |        |      |
|------------------|------------------------|--------|--------|------|
|                  | n-Nonane               | -0.003 | 0.003  | 0.2  |
|                  | n-Decane               | -0.004 | 0.004  | 0.2  |
|                  | Cyclohexane            | 0.000  | 0.000  | 1.8  |
| Alkenes & alkyne | Ethylene               | 0.045  | -0.046 | 1.1  |
|                  | Propylene              | 0.023  | -0.023 | 0.1  |
|                  | Acetylene              | 0.004  | -0.004 | 1.8  |
| Alcohol          | Methanol               | 0.016  | -0.016 | 10.0 |
|                  | Ethanol                | 0.001  | -0.001 | 0.3  |
|                  | Isopropyl alcohol      | 0.006  | -0.006 | 2.3  |
| Aromatics        | Benzene                | 0.007  | -0.007 | 1.2  |
|                  | Toluene                | 0.043  | -0.044 | 1.2  |
|                  | o-Xylene               | 0.009  | -0.010 | 0.1  |
|                  | m-Xylene               | 0.031  | -0.031 | 0.2  |
|                  | p-Xylene               | 0.011  | -0.011 | 0.1  |
|                  | Ethylbenzene           | 0.004  | -0.004 | 0.1  |
|                  | 1,2,3-Trimethylbenzene | 0.020  | -0.020 | 0.1  |

**Table S3: Percent change in formaldehyde (HCHO) formation in response to  $\pm 50\%$  changes in the initial mixing ratios of NMOC (MCMv331 Output), with ambient mixing ratios for relative importance.**

| NMOC Group       | Species            | $\Delta$ HCHO Formation (%;<br>+50% NMOC) | $\Delta$ HCHO Formation (%;<br>-50% NMOC) | Mixing Ratio<br>(ppb) |
|------------------|--------------------|-------------------------------------------|-------------------------------------------|-----------------------|
| Alkane           | Methane            | 6.168                                     | -6.141                                    | 4920.0                |
|                  | Ethane             | 0.743                                     | -0.759                                    | 123.0                 |
|                  | Propane            | -2.046                                    | 2.257                                     | 63.0                  |
|                  | n-Butane           | -0.700                                    | 0.802                                     | 25.0                  |
|                  | Isobutane          | 7.440                                     | -7.543                                    | 15.0                  |
|                  | n-Pentane          | -0.339                                    | 0.369                                     | 10.0                  |
|                  | Isopentane         | 0.169                                     | -0.158                                    | 11.0                  |
|                  | n-Hexane           | -0.760                                    | 0.822                                     | 4.0                   |
|                  | 2-Methylpentane    | -0.300                                    | 0.323                                     | 3.0                   |
|                  | 3-Methylpentane    | 0.161                                     | -0.159                                    | 2.0                   |
|                  | 2,2-Dimethylbutane | 0.019                                     | -0.016                                    | 0.3                   |
|                  | 2,3-Dimethylbutane | -0.433                                    | 0.445                                     | 1.6                   |
|                  | n-Heptane          | -0.806                                    | 0.856                                     | 1.9                   |
|                  | 2-Methylhexane     | -0.218                                    | 0.226                                     | 0.8                   |
|                  | 3-Methylhexane     | -0.416                                    | 0.433                                     | 1.2                   |
|                  | n-Octane           | -0.582                                    | 0.603                                     | 0.8                   |
|                  | n-Nonane           | -0.179                                    | 0.183                                     | 0.2                   |
|                  | n-Decane           | -0.205                                    | 0.210                                     | 0.2                   |
|                  | Cyclohexane        | -0.712                                    | 0.740                                     | 1.8                   |
| Alkenes & alkyne | Ethylene           | 4.604                                     | -4.568                                    | 1.1                   |
|                  | Propylene          | 2.486                                     | -2.471                                    | 0.1                   |

|           |                        |       |        |      |
|-----------|------------------------|-------|--------|------|
|           | Acetylene              | 0.137 | -0.134 | 1.8  |
| Alcohol   | Methanol               | 3.096 | -3.076 | 10.0 |
|           | Ethanol                | 0.066 | -0.065 | 0.3  |
|           | Isopropyl alcohol      | 0.550 | -0.553 | 2.3  |
|           |                        |       |        |      |
| Aromatics | Benzene                | 0.177 | -0.174 | 1.2  |
|           | Toluene                | 1.648 | -1.658 | 1.2  |
|           | o-Xylene               | 0.413 | -0.411 | 0.1  |
|           | m-Xylene               | 1.232 | -1.237 | 0.2  |
|           | p-Xylene               | 0.428 | -0.425 | 0.1  |
|           | Ethylbenzene           | 0.089 | -0.085 | 0.1  |
|           | 1,2,3-Trimethylbenzene | 1.020 | -1.024 | 0.1  |

**Table S4: Percent change in acetaldehyde (CH<sub>3</sub>CHO) formation in response to  $\pm 50\%$  changes in the initial mixing ratios of NMOC (MCMv331 Output), with ambient mixing ratios for relative importance.**

| NMOC Group          | Species            | $\Delta\text{CH}_3\text{CHO}$ Formation (%;<br>+50% NMOC) | $\Delta\text{CH}_3\text{CHO}$ Formation (%;<br>-50% NMOC) | Mixing Ratio<br>(ppb) |
|---------------------|--------------------|-----------------------------------------------------------|-----------------------------------------------------------|-----------------------|
| Alkane              | Methane            | 0.072                                                     | -0.089                                                    | 4920.0                |
|                     | Ethane             | 10.535                                                    | -10.688                                                   | 123.0                 |
|                     | Propane            | 0.315                                                     | -0.329                                                    | 63.0                  |
|                     | n-Butane           | 3.757                                                     | -3.886                                                    | 25.0                  |
|                     | Isobutane          | -0.208                                                    | 0.154                                                     | 15.0                  |
|                     | n-Pentane          | -0.100                                                    | 0.114                                                     | 10.0                  |
|                     | Isopentane         | 11.086                                                    | -11.490                                                   | 11.0                  |
|                     | n-Hexane           | -0.072                                                    | 0.060                                                     | 4.0                   |
|                     | 2-Methylpentane    | -0.250                                                    | 0.262                                                     | 3.0                   |
|                     | 3-Methylpentane    | 2.872                                                     | -2.907                                                    | 2.0                   |
|                     | 2,2-Dimethylbutane | 0.016                                                     | -0.017                                                    | 0.3                   |
|                     | 2,3-Dimethylbutane | -0.373                                                    | 0.378                                                     | 1.6                   |
|                     | n-Heptane          | -0.143                                                    | 0.133                                                     | 1.9                   |
|                     | 2-Methylhexane     | -0.364                                                    | 0.369                                                     | 0.8                   |
|                     | 3-Methylhexane     | 0.246                                                     | -0.247                                                    | 1.2                   |
|                     | n-Octane           | -0.132                                                    | 0.131                                                     | 0.8                   |
|                     | n-Nonane           | -0.089                                                    | 0.089                                                     | 0.2                   |
|                     | n-Decane           | -0.123                                                    | 0.124                                                     | 0.2                   |
|                     | Cyclohexane        | -0.664                                                    | 0.679                                                     | 1.8                   |
| Alkenes &<br>alkyne | Ethylene           | 0.359                                                     | -0.379                                                    | 1.1                   |
|                     | Propylene          | 2.880                                                     | -2.873                                                    | 0.1                   |
|                     | Acetylene          | 0.062                                                     | -0.063                                                    | 1.8                   |



|           |                        |       |        |      |
|-----------|------------------------|-------|--------|------|
| Alcohol   | Methanol               | 0.115 | -0.118 | 10.0 |
|           | Ethanol                | 0.510 | -0.511 | 0.3  |
|           | Isopropyl alcohol      | 0.743 | -0.748 | 2.3  |
| Aromatics | Benzene                | 0.060 | -0.060 | 1.2  |
|           | Toluene                | 0.312 | -0.341 | 1.2  |
|           | o-Xylene               | 0.081 | -0.083 | 0.1  |
|           | m-Xylene               | 0.277 | -0.290 | 0.2  |
|           | p-Xylene               | 0.117 | -0.118 | 0.1  |
|           | Ethylbenzene           | 0.134 | -0.134 | 0.1  |
|           | 1,2,3-Trimethylbenzene | 0.234 | -0.239 | 0.1  |

**Table S5: Percent change in methacrolein (MACR) formation in response to  $\pm 50\%$  changes in the initial mixing ratios of NMOC (MCMv331 Output), with ambient mixing ratios for relative importance.**

| NMOC Group       | Species            | $\Delta$ MACR Formation (%; +50% NMOC) | $\Delta$ MACR Formation (%; -50% NMOC) | Mixing Ratio (ppb) |
|------------------|--------------------|----------------------------------------|----------------------------------------|--------------------|
| Alkane           | Methane            | -1.791                                 | 1.900                                  | 4920.0             |
|                  | Ethane             | 3.490                                  | -3.490                                 | 123.0              |
|                  | Propane            | 10.293                                 | -10.050                                | 63.0               |
|                  | n-Butane           | 10.134                                 | -9.941                                 | 25.0               |
|                  | Isobutane          | -1.130                                 | 1.498                                  | 15.0               |
|                  | n-Pentane          | 9.632                                  | -9.439                                 | 10.0               |
|                  | Isopentane         | 9.322                                  | -9.180                                 | 11.0               |
|                  | n-Hexane           | 8.385                                  | -8.226                                 | 4.0                |
|                  | 2-Methylpentane    | 4.594                                  | -4.577                                 | 3.0                |
|                  | 3-Methylpentane    | 2.971                                  | -2.946                                 | 2.0                |
|                  | 2,2-Dimethylbutane | 0.092                                  | -0.092                                 | 0.3                |
|                  | 2,3-Dimethylbutane | 2.209                                  | -2.201                                 | 1.6                |
|                  | n-Heptane          | 6.485                                  | -6.360                                 | 1.9                |
|                  | 2-Methylhexane     | 2.192                                  | -2.184                                 | 0.8                |
|                  | 3-Methylhexane     | 3.824                                  | -3.791                                 | 1.2                |
|                  | n-Octane           | 3.715                                  | -3.674                                 | 0.8                |
|                  | n-Nonane           | 1.197                                  | -1.197                                 | 0.2                |
|                  | n-Decane           | 1.406                                  | -1.389                                 | 0.2                |
|                  | Cyclohexane        | 3.582                                  | -3.560                                 | 1.8                |
| Alkenes & alkyne | Ethylene           | -3.029                                 | 3.213                                  | 1.1                |
|                  | Propylene          | -2.444                                 | 2.544                                  | 0.1                |
|                  | Acetylene          | -0.485                                 | 0.485                                  | 1.8                |

|           |                        |        |        |      |
|-----------|------------------------|--------|--------|------|
| Alcohol   | Methanol               | -1.247 | 1.272  | 10.0 |
|           | Ethanol                | 0.109  | -0.117 | 0.3  |
|           | Isopropyl alcohol      | 0.921  | -0.921 | 2.3  |
| Aromatics | Benzene                | -0.527 | 0.527  | 1.2  |
|           | Toluene                | -3.414 | 3.665  | 1.2  |
|           | o-Xylene               | -0.762 | 0.770  | 0.1  |
|           | m-Xylene               | -2.444 | 2.586  | 0.2  |
|           | p-Xylene               | -0.962 | 0.979  | 0.1  |
|           | Ethylbenzene           | -0.351 | 0.343  | 0.1  |
|           | 1,2,3-Trimethylbenzene | -1.096 | 1.146  | 0.1  |

**Table S6: Percent change in benzaldehyde (Benzal) formation in response to  $\pm 50\%$  changes in the initial mixing ratios of NMOC (MCMv331 Output), with ambient mixing ratios for relative importance.**

| NMOC Group       | Species            | $\Delta$ MACR Formation (%; +50% NMOC) | $\Delta$ MACR Formation (%; -50% NMOC) | Mixing Ratio (ppb) |
|------------------|--------------------|----------------------------------------|----------------------------------------|--------------------|
| Alkane           | Methane            | -0.651                                 | 0.685                                  | 4920.0             |
|                  | Ethane             | 1.411                                  | -1.437                                 | 123.0              |
|                  | Propane            | 4.036                                  | -4.186                                 | 63.0               |
|                  | n-Butane           | 3.987                                  | -4.148                                 | 25.0               |
|                  | Isobutane          | -0.319                                 | 0.461                                  | 15.0               |
|                  | n-Pentane          | 3.765                                  | -3.905                                 | 10.0               |
|                  | Isopentane         | 3.689                                  | -3.835                                 | 11.0               |
|                  | n-Hexane           | 3.260                                  | -3.361                                 | 4.0                |
|                  | 2-Methylpentane    | 1.835                                  | -1.878                                 | 3.0                |
|                  | 3-Methylpentane    | 1.188                                  | -1.202                                 | 2.0                |
|                  | 2,2-Dimethylbutane | 0.038                                  | -0.038                                 | 0.3                |
|                  | 2,3-Dimethylbutane | 0.887                                  | -0.893                                 | 1.6                |
|                  | n-Heptane          | 2.524                                  | -2.574                                 | 1.9                |
|                  | 2-Methylhexane     | 0.870                                  | -0.875                                 | 0.8                |
|                  | 3-Methylhexane     | 1.503                                  | -1.530                                 | 1.2                |
|                  | n-Octane           | 1.450                                  | -1.467                                 | 0.8                |
|                  | n-Nonane           | 0.474                                  | -0.475                                 | 0.2                |
|                  | n-Decane           | 0.551                                  | -0.553                                 | 0.2                |
|                  | Cyclohexane        | 1.417                                  | -1.440                                 | 1.8                |
| Alkenes & alkyne | Ethylene           | -1.163                                 | 1.207                                  | 1.1                |
|                  | Propylene          | -0.945                                 | 0.968                                  | 0.1                |
|                  | Acetylene          | -0.189                                 | 0.187                                  | 1.8                |

|           |                        |        |        |      |
|-----------|------------------------|--------|--------|------|
| Alcohol   | Methanol               | -0.474 | 0.479  | 10.0 |
|           | Ethanol                | 0.044  | -0.047 | 0.3  |
|           | Isopropyl alcohol      | 0.375  | -0.379 | 2.3  |
| Aromatics | Benzene                | -0.196 | 0.195  | 1.2  |
|           | Toluene                | -0.090 | 0.167  | 1.2  |
|           | o-Xylene               | -0.287 | 0.291  | 0.1  |
|           | m-Xylene               | -0.930 | 0.964  | 0.2  |
|           | p-Xylene               | -0.367 | 0.370  | 0.1  |
|           | Ethylbenzene           | -0.080 | 0.080  | 0.1  |
|           | 1,2,3-Trimethylbenzene | -0.407 | 0.419  | 0.1  |

**Table S7: Percent change in methyl ethyl ketone (MEK) formation in response to  $\pm 50\%$  changes in the initial mixing ratios of NMOC (MCMv331 Output), with ambient mixing ratios for relative importance.**

| NMOC Group       | Species            | $\Delta$ MEK Formation (%; +50% NMOC) | $\Delta$ MEK Formation (%; -50% NMOC) | Mixing Ratio (ppb) |
|------------------|--------------------|---------------------------------------|---------------------------------------|--------------------|
| Alkane           | Methane            | 0.424                                 | -0.447                                | 4920.0             |
|                  | Ethane             | -1.183                                | 1.225                                 | 123.0              |
|                  | Propane            | -3.216                                | 3.487                                 | 63.0               |
|                  | n-Butane           | 37.599                                | -40.113                               | 25.0               |
|                  | Isobutane          | 0.091                                 | -0.198                                | 15.0               |
|                  | n-Pentane          | -2.915                                | 3.154                                 | 10.0               |
|                  | Isopentane         | -2.050                                | 2.234                                 | 11.0               |
|                  | n-Hexane           | -2.498                                | 2.671                                 | 4.0                |
|                  | 2-Methylpentane    | -1.448                                | 1.510                                 | 3.0                |
|                  | 3-Methylpentane    | 5.227                                 | -5.322                                | 2.0                |
|                  | 2,2-Dimethylbutane | -0.027                                | 0.028                                 | 0.3                |
|                  | 2,3-Dimethylbutane | -0.695                                | 0.706                                 | 1.6                |
|                  | n-Heptane          | -1.913                                | 2.006                                 | 1.9                |
|                  | 2-Methylhexane     | -0.660                                | 0.671                                 | 0.8                |
|                  | 3-Methylhexane     | -1.089                                | 1.122                                 | 1.2                |
|                  | n-Octane           | -1.103                                | 1.133                                 | 0.8                |
|                  | n-Nonane           | -0.363                                | 0.368                                 | 0.2                |
|                  | n-Decane           | -0.421                                | 0.430                                 | 0.2                |
|                  | Cyclohexane        | -1.135                                | 1.170                                 | 1.8                |
| Alkenes & alkyne | Ethylene           | 0.892                                 | -0.918                                | 1.1                |
|                  | Propylene          | 0.674                                 | -0.686                                | 0.1                |
|                  | Acetylene          | 0.139                                 | -0.137                                | 1.8                |

|           |                        |        |        |      |
|-----------|------------------------|--------|--------|------|
| Alcohol   | Methanol               | 0.334  | -0.336 | 10.0 |
|           | Ethanol                | -0.039 | 0.040  | 0.3  |
|           | Isopropyl alcohol      | -0.322 | 0.325  | 2.3  |
| Aromatics | Benzene                | 0.144  | -0.145 | 1.2  |
|           | Toluene                | 0.852  | -0.896 | 1.2  |
|           | o-Xylene               | 0.193  | -0.194 | 0.1  |
|           | m-Xylene               | 0.627  | -0.648 | 0.2  |
|           | p-Xylene               | 0.264  | -0.265 | 0.1  |
|           | Ethylbenzene           | 0.091  | -0.091 | 0.1  |
|           | 1,2,3-Trimethylbenzene | 0.261  | -0.270 | 0.1  |

**Table S8.1: Ozone Production and Loss Budget on Day 4 (MCMv331 Output).**

| Top 5 Reactions Contributing to Ozone Production |                                                       |                                                           |                              |
|--------------------------------------------------|-------------------------------------------------------|-----------------------------------------------------------|------------------------------|
| No.                                              | Reaction                                              | Integrated Reaction Rate<br>(molecules cm <sup>-3</sup> ) | Percent of Production<br>(%) |
| 1                                                | $O \rightarrow O_3$                                   | $1.25 \times 10^3$                                        | 100                          |
| 2                                                | $CH_3CO_3 + HO_2 \rightarrow \text{Products} + O_3$   | $2.82 \times 10^{-3}$                                     | $2.26 \times 10^{-4}$        |
| 3                                                | $C_6H_5CO_3 + HO_2 \rightarrow \text{Products} + O_3$ | $9.91 \times 10^{-4}$                                     | $7.93 \times 10^{-5}$        |
| 4                                                | $C_2H_5CO_3 + HO_2 \rightarrow \text{Products} + O_3$ | $6.90 \times 10^{-4}$                                     | $5.52 \times 10^{-5}$        |
| 5                                                | $C_3H_7CO_3 + HO_2 \rightarrow \text{Products} + O_3$ | $4.16 \times 10^{-4}$                                     | $3.33 \times 10^{-5}$        |
|                                                  | Total Production                                      | $= 1.25 \times 10^3 \text{ molecules cm}^{-3}$            |                              |
| Top 5 Reactions Contributing to Ozone Loss       |                                                       |                                                           |                              |
| No.                                              | Reaction                                              | Integrated Reaction Rate<br>(molecules cm <sup>-3</sup> ) | Percent of Loss (%)          |
| 1                                                | $O_3 + h\nu \rightarrow O$                            | $9.29 \times 10^2$                                        | 75.9                         |
| 2                                                | $NO + O_3 \rightarrow \text{Products}$                | $2.45 \times 10^2$                                        | 20.0                         |
| 3                                                | $O_3 + h\nu \rightarrow O^1D$                         | $4.22 \times 10^1$                                        | 3.45                         |
| 4                                                | $NO_2 + O_3 \rightarrow \text{Products}$              | 3.33                                                      | 0.272                        |
| 5                                                | $C_6H_5O + O_3 \rightarrow \text{Products}$           | 2.31                                                      | 0.189                        |
|                                                  | Total Loss                                            | $= 1.22 \times 10^3 \text{ molecules cm}^{-3}$            |                              |

**Table S8.2: Ozone Production and Loss Budget on Day 4 (SAPRC07 Output).**

| Top 5 Reactions Contributing to Ozone Production |                                                                                      |                                                           |                              |
|--------------------------------------------------|--------------------------------------------------------------------------------------|-----------------------------------------------------------|------------------------------|
| No.                                              | Reaction                                                                             | Integrated Reaction Rate<br>(molecules cm <sup>-3</sup> ) | Percent of Production<br>(%) |
| 1                                                | $O^3P + O_2 + M \rightarrow O_3$                                                     | $1.28 \times 10^3$                                        | 100                          |
| 2                                                | $MECO_3$ (Methyl ethyl peroxy radical)<br>$+ HO_2 \rightarrow \text{Products} + O_3$ | $6.89 \times 10^{-3}$                                     | $5.39 \times 10^{-4}$        |
| 3                                                | $RCO_3$ (Acyl peroxy radical)<br>$+ HO_2 \rightarrow \text{Products} + O_3$          | $2.05 \times 10^{-3}$                                     | $1.60 \times 10^{-4}$        |

|                                            |                                                                                               |                                                           |                       |
|--------------------------------------------|-----------------------------------------------------------------------------------------------|-----------------------------------------------------------|-----------------------|
| 4                                          | BZCO <sub>3</sub> (Benzoyl peroxy radical) + HO <sub>2</sub> → Products + O <sub>3</sub>      | $1.05 \times 10^{-3}$                                     | $8.22 \times 10^{-5}$ |
| 5                                          | MACO <sub>3</sub> (Methacryloyl peroxy radical) + HO <sub>2</sub> → Products + O <sub>3</sub> | $7.13 \times 10^{-4}$                                     | $5.58 \times 10^{-5}$ |
|                                            | Total Production                                                                              | $= 1.28 \times 10^3 \text{ molecules cm}^{-3}$            |                       |
| Top 5 Reactions Contributing to Ozone Loss |                                                                                               |                                                           |                       |
| No.                                        | Reaction                                                                                      | Integrated Reaction Rate<br>(molecules cm <sup>-3</sup> ) | Percent of Loss (%)   |
| 1                                          | O <sub>3</sub> + hv → O <sup>3</sup> P                                                        | $9.52 \times 10^2$                                        | 76.2                  |
| 2                                          | NO + O <sub>3</sub> → Products                                                                | $2.50 \times 10^2$                                        | 20.0                  |
| 3                                          | O <sub>3</sub> + hv → O <sup>1</sup> D                                                        | $4.32 \times 10^1$                                        | 3.46                  |
| 4                                          | NO <sub>2</sub> + O <sub>3</sub> → Products                                                   | 3.43                                                      | 0.275                 |
| 5                                          | HO <sub>2</sub> + O <sub>3</sub> → Products                                                   | 0.940                                                     | 0.0752                |
|                                            | Total Loss                                                                                    | $= 1.25 \times 10^3 \text{ molecules cm}^{-3}$            |                       |

**Table S8.3: Ozone Production and Loss Budget on Day 4 (RACM2 Output).**

| Reaction Contributing to Ozone Production  |                                                    |                                                           |                              |
|--------------------------------------------|----------------------------------------------------|-----------------------------------------------------------|------------------------------|
| No.                                        | Reaction                                           | Integrated Reaction Rate<br>(molecules cm <sup>-3</sup> ) | Percent of Production<br>(%) |
| 1                                          | O <sup>3</sup> P + O <sub>2</sub> → O <sub>3</sub> | 1.17 × 10 <sup>3</sup>                                    | 100                          |
|                                            | Total Production                                   | = 1.17 × 10 <sup>3</sup> molecules cm <sup>-3</sup>       |                              |
| Top 5 Reactions Contributing to Ozone Loss |                                                    |                                                           |                              |
| No.                                        | Reaction                                           | Integrated Reaction Rate<br>(molecules cm <sup>-3</sup> ) | Percent of Loss (%)          |
| 1                                          | O <sub>3</sub> → O <sup>3</sup> P + O <sub>2</sub> | 8.62 × 10 <sup>2</sup>                                    | 74.9                         |
| 2                                          | O <sub>3</sub> + NO → Products                     | 2.45 × 10 <sup>2</sup>                                    | 21.3                         |
| 3                                          | O <sub>3</sub> → Products                          | 3.91 × 10 <sup>1</sup>                                    | 3.40                         |
| 4                                          | NO <sub>2</sub> + O <sub>3</sub> → Products        | 3.07                                                      | 0.267                        |
| 5                                          | O <sub>3</sub> + HO <sub>2</sub> → Products        | 0.705                                                     | 0.0613                       |
|                                            | Total Loss                                         | = 1.15 × 10 <sup>3</sup> molecules cm <sup>-3</sup>       |                              |

**Table S8.4: Ozone Production and Loss Budget on Day 4 (CB6 Output).**

| Reactions Contributing to Ozone Production |                                                                                             |                                                           |                              |
|--------------------------------------------|---------------------------------------------------------------------------------------------|-----------------------------------------------------------|------------------------------|
| No.                                        | Reaction                                                                                    | Integrated Reaction Rate<br>(molecules cm <sup>-3</sup> ) | Percent of Production<br>(%) |
| 1                                          | O <sup>3</sup> P → O <sub>3</sub>                                                           | $1.38 \times 10^3$                                        | 100                          |
| 2                                          | C <sub>3</sub> O <sub>2</sub> + HO <sub>2</sub> → Products + O <sub>3</sub>                 | $6.07 \times 10^{-3}$                                     | $4.40 \times 10^{-4}$        |
| 3                                          | CXO <sub>3</sub> (Acyl peroxy radical) + HO <sub>2</sub> → Products + O <sub>3</sub>        | $3.78 \times 10^{-3}$                                     | $2.74 \times 10^{-4}$        |
| 4                                          | OPO <sub>3</sub> (Glyoxyl peroxyacyl radical) + HO <sub>2</sub> → Products + O <sub>3</sub> | $1.09 \times 10^{-3}$                                     | $7.87 \times 10^{-5}$        |
|                                            | Total Production                                                                            | $= 1.38 \times 10^3 \text{ molecules cm}^{-3}$            |                              |

| Top 5 Reactions Contributing to Ozone Loss |                                             |                                                           |                     |
|--------------------------------------------|---------------------------------------------|-----------------------------------------------------------|---------------------|
| No.                                        | Reaction                                    | Integrated Reaction Rate<br>(molecules cm <sup>-3</sup> ) | Percent of Loss (%) |
| 1                                          | O <sub>3</sub> → O <sup>3</sup> P           | 1.05 × 10 <sup>3</sup>                                    | 77.7                |
| 2                                          | NO + O <sub>3</sub> → Products              | 2.47 × 10 <sup>2</sup>                                    | 18.3                |
| 3                                          | O <sub>3</sub> → O <sup>1</sup> D           | 4.75 × 10 <sup>1</sup>                                    | 3.53                |
| 4                                          | NO <sub>2</sub> + O <sub>3</sub> → Products | 3.78                                                      | 0.280               |
| 5                                          | HO <sub>2</sub> + O <sub>3</sub> → Products | 1.58                                                      | 0.117               |
| Total Loss                                 |                                             | = 1.35 × 10 <sup>3</sup> molecules cm <sup>-3</sup>       |                     |

**Table S9.1: Hydrogen oxide radicals (HOx) Production and Loss Budget on Day 4 (MCMv331 Output)**

| Top 5 Reactions Contributing to HOx Production |                                                              |                                                           |                              |
|------------------------------------------------|--------------------------------------------------------------|-----------------------------------------------------------|------------------------------|
| No.                                            | Reaction                                                     | Integrated Reaction Rate<br>(molecules cm <sup>-3</sup> ) | Percent of Production<br>(%) |
| 1                                              | HO <sub>2</sub> NO <sub>2</sub> → HO <sub>2</sub> + Products | 4.92                                                      | 23.2                         |
| 2                                              | CH <sub>3</sub> O → HO <sub>2</sub> + Products               | 1.83                                                      | 8.62                         |
| 3                                              | O <sup>1</sup> D → OH + OH                                   | 1.83                                                      | 8.62                         |
| 4                                              | HCHO + hν → HO <sub>2</sub> + HO <sub>2</sub> + Products     | 1.69                                                      | 7.99                         |
| 5                                              | C <sub>2</sub> H <sub>5</sub> O → HO <sub>2</sub> + Products | 1.59                                                      | 7.48                         |
| Total Production                               |                                                              | = 21.2 molecules cm <sup>-3</sup>                         |                              |
| Top 5 Reactions Contributing to HOx Loss       |                                                              |                                                           |                              |
| No.                                            | Reaction                                                     | Integrated Reaction Rate<br>(molecules cm <sup>-3</sup> ) | Percent of Loss (%)          |
| 1                                              | HO <sub>2</sub> + NO <sub>2</sub> → Products                 | 5.21                                                      | 24.6                         |
| 2                                              | OH + NC <sub>4</sub> H <sub>10</sub> (n-butane) → Products   | 1.05                                                      | 4.95                         |
| 3                                              | OH + C <sub>3</sub> H <sub>8</sub> → Products                | 0.949                                                     | 4.48                         |
| 4                                              | OH + CH <sub>3</sub> CHO → Products                          | 0.834                                                     | 3.93                         |
| 5                                              | OH + BENZAL (Benzaldehyde) → Products                        | 0.609                                                     | 2.87                         |
| Total Loss                                     |                                                              | = 21.2 molecules cm <sup>-3</sup>                         |                              |

**Table S9.2: HOx Production and Loss Budget on Day 4 (SAPRC07 Output)**

| Top 5 Reactions Contributing to HOx Production |                                                                            |                                                           |                              |
|------------------------------------------------|----------------------------------------------------------------------------|-----------------------------------------------------------|------------------------------|
| No.                                            | Reaction                                                                   | Integrated Reaction Rate<br>(molecules cm <sup>-3</sup> ) | Percent of Production<br>(%) |
| 1                                              | HNO <sub>4</sub> → HO <sub>2</sub> + Products                              | 8.55                                                      | 36.0                         |
| 2                                              | NO + xHO <sub>2</sub> → HO <sub>2</sub> + Products                         | 8.07                                                      | 33.9                         |
| 3                                              | MEO <sub>2</sub> (Methyl peroxy radical) + NO → HO <sub>2</sub> + Products | 1.93                                                      | 8.11                         |

|                                          |                                                                              |                                                           |                     |
|------------------------------------------|------------------------------------------------------------------------------|-----------------------------------------------------------|---------------------|
| 4                                        | $\text{O}^1\text{D} + \text{HO}_2 \rightarrow \text{OH} + \text{OH}$         | 1.78                                                      | 7.50                |
| 5                                        | $\text{HCHO} + h\nu \rightarrow \text{HO}_2 + \text{HO}_2 + \text{Products}$ | 1.69                                                      | 7.13                |
|                                          | Total Production                                                             | = 23.7 molecules $\text{cm}^{-3}$                         |                     |
| Top 5 Reactions Contributing to HOx Loss |                                                                              |                                                           |                     |
| No.                                      | Reaction                                                                     | Integrated Reaction Rate<br>(molecules $\text{cm}^{-3}$ ) | Percent of Loss (%) |
| 1                                        | $\text{HO}_2 + \text{NO}_2 \rightarrow \text{Products}$                      | 8.81                                                      | 37.1                |
| 2                                        | $\text{ALK4 (2-Methylhexane)} + \text{OH} \rightarrow \text{Products}$       | 3.39                                                      | 14.3                |
| 3                                        | $\text{ALK3 (n-Pentane)} + \text{OH} \rightarrow \text{Products}$            | 2.10                                                      | 8.85                |
| 4                                        | $\text{CCHO (Acetaldehyde)} + \text{OH} \rightarrow \text{Products}$         | 1.47                                                      | 6.19                |
| 5                                        | $\text{ALK5 (n-Octane)} + \text{OH} \rightarrow \text{Products}$             | 1.17                                                      | 4.94                |
|                                          | Total Loss                                                                   | = 23.7 molecules $\text{cm}^{-3}$                         |                     |

**Table S9.3: HOx Production and Loss Budget on Day 4 (RACM2 Output)**

| Top 5 Reactions Contributing to HOx Production |                                                                  |                                                           |                              |
|------------------------------------------------|------------------------------------------------------------------|-----------------------------------------------------------|------------------------------|
| No.                                            | Reaction                                                         | Integrated Reaction Rate<br>(molecules cm <sup>-3</sup> ) | Percent of Production<br>(%) |
| 1                                              | HO <sub>2</sub> NO <sub>2</sub> → HO <sub>2</sub> + Products     | 6.83                                                      | 30.9                         |
| 2                                              | HC3P (Peroxy radicals ) + NO →<br>HO <sub>2</sub> + Products     | 2.52                                                      | 11.4                         |
| 3                                              | MO2 (Methyl peroxy radical) + NO<br>→ HO <sub>2</sub> + Products | 2.32                                                      | 10.5                         |
| 4                                              | O <sup>1</sup> D + HO <sub>2</sub> → OH + OH                     | 2.13                                                      | 9.62                         |
| 5                                              | HCHO → HO <sub>2</sub> + HO <sub>2</sub> + Products              | 1.99                                                      | 8.99                         |
|                                                | Total Production                                                 | = 22.1 molecules cm <sup>-3</sup>                         |                              |
| Top 5 Reactions Contributing to HOx Loss       |                                                                  |                                                           |                              |
| No.                                            | Reaction                                                         | Integrated Reaction Rate<br>(molecules cm <sup>-3</sup> ) | Percent of Loss (%)          |
| 1                                              | HO <sub>2</sub> + NO <sub>2</sub> → Products                     | 7.11                                                      | 32.2                         |
| 2                                              | OH + HC3 → Products                                              | 4.16                                                      | 18.9                         |
| 3                                              | OH + HC5 → Products                                              | 3.02                                                      | 13.7                         |
| 4                                              | OH + ACD (Acetaldehyde) →<br>Products                            | 1.52                                                      | 6.92                         |
| 5                                              | MACR (Methacrolein) + OH →<br>Products                           | 0.849                                                     | 3.84                         |
|                                                | Total Loss                                                       | = 22.1 molecules cm <sup>-3</sup>                         |                              |

**Table S9.4: HOx Production and Loss Budget on Day 4 (CB6 Output)**

| Top 5 Reactions Contributing to HOx Production |                                                                                 |                                                           |                              |
|------------------------------------------------|---------------------------------------------------------------------------------|-----------------------------------------------------------|------------------------------|
| No.                                            | Reaction                                                                        | Integrated Reaction Rate<br>(molecules cm <sup>-3</sup> ) | Percent of Production<br>(%) |
| 1                                              | PNA (Peroxyacetyl nitrate) → HO <sub>2</sub> + Products                         | 14.7                                                      | 37.8                         |
| 2                                              | ROR (Alkoxy radicals) → HO <sub>2</sub> + Products                              | 7.62                                                      | 19.7                         |
| 3                                              | XO <sub>2</sub> H (Hydroperoxy alkyl radical) + NO → HO <sub>2</sub> + Products | 5.79                                                      | 14.9                         |
| 4                                              | O <sup>1</sup> D + HO <sub>2</sub> → OH + OH                                    | 2.05                                                      | 5.28                         |
| 5                                              | FORM (Formaldehyde) → HO <sub>2</sub> + HO <sub>2</sub> + Products              | 1.54                                                      | 3.98                         |
|                                                | Total Production                                                                | = 38.7 molecules cm <sup>-3</sup>                         |                              |
| Top 5 Reactions Contributing to HOx Loss       |                                                                                 |                                                           |                              |
| No.                                            | Reaction                                                                        | Integrated Reaction Rate<br>(molecules cm <sup>-3</sup> ) | Percent of Loss (%)          |
| 1                                              | HO <sub>2</sub> + NO <sub>2</sub> → Products                                    | 15.3                                                      | 39.5                         |
| 2                                              | OH + PAR (Paraffins) → Products                                                 | 10.7                                                      | 27.6                         |
| 3                                              | OH + PRPA (Propionaldehyde) → Products                                          | 1.80                                                      | 4.64                         |
| 4                                              | OH + ALD2 (Acetaldehyde) → Products                                             | 1.40                                                      | 3.60                         |
| 5                                              | OH + ALDX (Higher aldehydes)→ Products                                          | 1.31                                                      | 3.39                         |
|                                                | Total Loss                                                                      | = 38.7 molecules cm <sup>-3</sup>                         |                              |

**Table S10.1: Carbonyl Production and Loss Budget on Day 4 (MCMv331 Output)**

| Top 5 Reactions Contributing to Formaldehyde (HCHO) Production                |                                                                  |                                                           |                           |
|-------------------------------------------------------------------------------|------------------------------------------------------------------|-----------------------------------------------------------|---------------------------|
| No.                                                                           | Reaction                                                         | Integrated Reaction Rate<br>(molecules cm <sup>-3</sup> ) | Percent of Production (%) |
| 1                                                                             | CH <sub>3</sub> O → HCHO + Products                              | 1.83                                                      | 55.3                      |
| 2                                                                             | CH <sub>3</sub> OH + OH → HCHO + Products                        | 0.189                                                     | 5.70                      |
| 3                                                                             | HOCH <sub>2</sub> CH <sub>2</sub> O → HCHO + HCHO + Products     | 0.162                                                     | 4.89                      |
| 4                                                                             | C <sub>2</sub> H <sub>4</sub> + O <sub>3</sub> → HCHO + Products | 0.111                                                     | 3.35                      |
| 5                                                                             | CH <sub>3</sub> COCH <sub>2</sub> O → HCHO + Products            | 0.0912                                                    | 2.76                      |
|                                                                               | Total Production                                                 | = 3.31 molecules cm <sup>-3</sup>                         |                           |
| Reactions Contributing to Formaldehyde (HCHO) Loss                            |                                                                  |                                                           |                           |
| No.                                                                           | Reaction                                                         | Integrated Reaction Rate<br>(molecules cm <sup>-3</sup> ) | Percent of Loss (%)       |
| 1                                                                             | HCHO + hv → Products                                             | 2.35                                                      | 88.3                      |
| 2                                                                             | OH + HCHO → Products                                             | 0.309                                                     | 11.6                      |
| 3                                                                             | NO <sub>3</sub> + HCHO → Products                                | 1.30 × 10 <sup>-3</sup>                                   | 0.0491                    |
|                                                                               | Total Loss                                                       | = 2.66 molecules cm <sup>-3</sup>                         |                           |
|                                                                               |                                                                  |                                                           |                           |
| Top 5 Reactions Contributing to Acetaldehyde (CH <sub>3</sub> CHO) Production |                                                                  |                                                           |                           |



| No.                                                               | Reaction                                                                                  | Integrated Reaction Rate<br>(molecules cm <sup>-3</sup> ) | Percent of Production<br>(%) |
|-------------------------------------------------------------------|-------------------------------------------------------------------------------------------|-----------------------------------------------------------|------------------------------|
| 1                                                                 | C <sub>2</sub> H <sub>5</sub> O → CH <sub>3</sub> CHO + Products                          | 1.59                                                      | 74.9                         |
| 2                                                                 | HYPROPO (1-Hydroxypropane-2-<br>yloxy radical) → CH <sub>3</sub> CHO + Products           | 0.0689                                                    | 3.25                         |
| 3                                                                 | IPROPOLO (2-Hydroxypropoxy<br>radical) → CH <sub>3</sub> CHO + Products                   | 0.0610                                                    | 2.88                         |
| 4                                                                 | SC <sub>4</sub> H <sub>9</sub> O (sec-Butoxy radical) →<br>CH <sub>3</sub> CHO + Products | 0.0576                                                    | 2.72                         |
| 5                                                                 | C <sub>3</sub> H <sub>7</sub> CHO + hv → CH <sub>3</sub> CHO +<br>Products                | 0.0556                                                    | 2.62                         |
|                                                                   | Total Production                                                                          | = 2.12 molecules cm <sup>-3</sup>                         |                              |
| Reactions Contributing to Acetaldehyde (CH <sub>3</sub> CHO) Loss |                                                                                           |                                                           |                              |
| No.                                                               | Reaction                                                                                  | Integrated Reaction Rate<br>(molecules cm <sup>-3</sup> ) | Percent of Loss (%)          |
| 1                                                                 | OH + CH <sub>3</sub> CHO → Products                                                       | 0.878                                                     | 83.8                         |
| 2                                                                 | CH <sub>3</sub> CHO + hv → Products                                                       | 0.164                                                     | 15.8                         |
| 3                                                                 | NO <sub>3</sub> + CH <sub>3</sub> CHO → Products                                          | 0.00455                                                   | 0.435                        |
|                                                                   | Total Loss                                                                                | = 1.05 molecules cm <sup>-3</sup>                         |                              |
| Reaction Contributing to Methacrolein (MACR) Production           |                                                                                           |                                                           |                              |
| No.                                                               | Reaction                                                                                  | Integrated Reaction Rate<br>(molecules cm <sup>-3</sup> ) | Percent of Production<br>(%) |
| 1                                                                 | Emis = MACR                                                                               | 0.511                                                     | 100                          |
|                                                                   | Total Production                                                                          | = 0.510 molecules cm <sup>-3</sup>                        |                              |
| Top 5 Reactions Contributing to Methacrolein (MACR) Loss          |                                                                                           |                                                           |                              |
| No.                                                               | Reaction                                                                                  | Integrated Reaction Rate<br>(molecules cm <sup>-3</sup> ) | Percent of Loss (%)          |
| 1                                                                 | OH + MACR → Products                                                                      | 0.122                                                     | 37.4                         |
| 2                                                                 | OH + MACR → Products                                                                      | 0.117                                                     | 35.9                         |
| 3                                                                 | O <sub>3</sub> + MACR → Products                                                          | 0.0258                                                    | 7.91                         |
| 4                                                                 | OH + MACR → Products                                                                      | 0.0207                                                    | 6.36                         |
| 5                                                                 | MACR + hv → Products                                                                      | 0.0178                                                    | 5.48                         |
|                                                                   | Total Loss                                                                                | = 0.330 molecules cm <sup>-3</sup>                        |                              |
| Top 5 Reactions Contributing to Benzaldehyde (BENZAL) Production  |                                                                                           |                                                           |                              |
| No.                                                               | Reaction                                                                                  | Integrated Reaction Rate<br>(molecules cm <sup>-3</sup> ) | Percent of Production<br>(%) |
| 1                                                                 | Emis → BENZAL                                                                             | 1.69                                                      | 99.3                         |
| 2                                                                 | C <sub>6</sub> H <sub>5</sub> CH <sub>2</sub> O → BENZAL + Products                       | 0.0117                                                    | 0.688                        |
| 3                                                                 | C <sub>6</sub> H <sub>5</sub> CH <sub>2</sub> OOH + OH → BENZAL +<br>Products             | 3.07 × 10 <sup>-4</sup>                                   | 0.0181                       |
| 4                                                                 | C <sub>6</sub> H <sub>5</sub> CH <sub>2</sub> NO <sub>3</sub> + OH → BENZAL +<br>Products | 2.81 × 10 <sup>-4</sup>                                   | 0.0165                       |
| 5                                                                 | C <sub>6</sub> H <sub>5</sub> CH <sub>2</sub> O <sub>2</sub> + RO <sub>2</sub> = BENZAL   | 4.53 × 10 <sup>-5</sup>                                   | 0.00267                      |
|                                                                   | Total Production                                                                          | = 1.70 molecules cm <sup>-3</sup>                         |                              |
| Reactions Contributing to Benzaldehyde (BENZAL) Loss              |                                                                                           |                                                           |                              |
| No.                                                               | Reaction                                                                                  | Integrated Reaction Rate<br>(molecules cm <sup>-3</sup> ) | Percent of Loss (%)          |
| 1                                                                 | OH + BENZAL → Products                                                                    | 0.609                                                     | 74.3                         |
| 2                                                                 | BENZAL + hv → Products                                                                    | 0.203                                                     | 24.9                         |
| 3                                                                 | NO <sub>3</sub> + BENZAL → Products                                                       | 7.32 × 10 <sup>-3</sup>                                   | 0.893                        |
|                                                                   | Total Loss                                                                                | = 0.820 molecules cm <sup>-3</sup>                        |                              |

| Top 5 Reactions Contributing to Methyl Ethyl Ketone (MEK) Production |                                                                                          |                                                           |                              |
|----------------------------------------------------------------------|------------------------------------------------------------------------------------------|-----------------------------------------------------------|------------------------------|
| No.                                                                  | Reaction                                                                                 | Integrated Reaction Rate<br>(molecules cm <sup>-3</sup> ) | Percent of Production<br>(%) |
| 1                                                                    | SC <sub>4</sub> H <sub>9</sub> O → MEK + Products                                        | 0.876                                                     | 84.4                         |
| 2                                                                    | M <sub>3</sub> PECO (1-Methyl-1-ethylpropoxyradical) → MEK + Products                    | 0.123                                                     | 11.9                         |
| 3                                                                    | OH + SC <sub>4</sub> H <sub>9</sub> OOH (sec-butyl hydroperoxide) → MEK + Products       | 0.0282                                                    | 2.72                         |
| 4                                                                    | M <sub>2</sub> BKBO → MEK + Products                                                     | 0.00358                                                   | 0.345                        |
| 5                                                                    | OH + SC <sub>4</sub> H <sub>9</sub> NO <sub>3</sub> (sec-Butyl Nitrate) → MEK + Products | 0.00313                                                   | 0.301                        |
| Total Production                                                     |                                                                                          | = 1.04 molecules cm <sup>-3</sup>                         |                              |
| Reactions Contributing to Methyl Ethyl Ketone (MEK) Loss             |                                                                                          |                                                           |                              |
| No.                                                                  | Reaction                                                                                 | Integrated Reaction Rate<br>(molecules cm <sup>-3</sup> ) | Percent of Loss (%)          |
| 1                                                                    | MEK + hv → Products                                                                      | 0.111                                                     | 72.0                         |
| 2                                                                    | MEK + OH → Products                                                                      | 0.0199                                                    | 12.9                         |
| 3                                                                    | MEK + OH → Products                                                                      | 0.0197                                                    | 12.9                         |
| 4                                                                    | MEK + OH → Products                                                                      | 0.00340                                                   | 2.21                         |
| Total Production                                                     |                                                                                          | = 0.150 molecules cm <sup>-3</sup>                        |                              |

**Table S10.2: Carbonyl Production and Loss Budget on Day 4 (SAPRC07 Output)**

| Top 5 Reactions Contributing to Formaldehyde (HCHO) Production |                                                                        |                                                           |                              |
|----------------------------------------------------------------|------------------------------------------------------------------------|-----------------------------------------------------------|------------------------------|
| No.                                                            | Reaction                                                               | Integrated Reaction Rate<br>(molecules cm <sup>-3</sup> ) | Percent of Production<br>(%) |
| 1                                                              | MEO <sub>2</sub> (Methyl peroxy radical) + NO → HCHO + Products        | 1.91                                                      | 59.2                         |
| 2                                                              | NO + xHCHO → HCHO + Products                                           | 0.738                                                     | 22.7                         |
| 3                                                              | MEOH + OH → HCHO + Products                                            | 0.167                                                     | 5.15                         |
| 4                                                              | MACO <sub>3</sub> (Methacryloyl peroxy radical) + NO → HCHO + Products | 0.114                                                     | 3.51                         |
| 5                                                              | ETHE (Ethene) + O <sub>3</sub> → HCHO + Products                       | 0.114                                                     | 3.51                         |
| Total Production                                               |                                                                        | = 3.25 molecules cm <sup>-3</sup>                         |                              |
| Reactions Contributing to Formaldehyde (HCHO) Loss             |                                                                        |                                                           |                              |
| No.                                                            | Reaction                                                               | Integrated Reaction Rate<br>(molecules cm <sup>-3</sup> ) | Percent of Loss (%)          |
| 1                                                              | HCHO + hv → Products                                                   | 2.35                                                      | 89.5                         |
| 2                                                              | OH + HCHO → Products                                                   | 0.275                                                     | 10.5                         |
| 3                                                              | NO <sub>3</sub> + HCHO → Products                                      | 0.00144                                                   | 0.0550                       |
| Total Loss                                                     |                                                                        | = 2.62 molecules cm <sup>-3</sup>                         |                              |
| Top 5 Reactions Contributing to Acetaldehyde (CCHO) Production |                                                                        |                                                           |                              |
| No.                                                            | Reaction                                                               | Integrated Reaction Rate<br>(molecules cm <sup>-3</sup> ) | Percent of Production<br>(%) |
| 1                                                              | NO + xCCHO = CCHO + Products                                           | 3.71                                                      | 98.3                         |
| 2                                                              | NO <sub>3</sub> + xCCHO = CCHO + Products                              | 0.0183                                                    | 0.485                        |
| 3                                                              | RNO <sub>3</sub> + hv = 0.21 CCHO + Products                           | 0.0157                                                    | 0.415                        |
| 4                                                              | OLE1 (Terminal alkene) + O <sub>3</sub> = 0.15 CCHO + Products         | 0.0145                                                    | 0.385                        |

|                                                                      |                                                                         |                                                        |                           |
|----------------------------------------------------------------------|-------------------------------------------------------------------------|--------------------------------------------------------|---------------------------|
| 5                                                                    | MECO <sub>3</sub> (2-butanoyl peroxy radical) + xCCHO = CCHO + Products | 0.00782                                                | 0.207                     |
|                                                                      | Total Production                                                        | = 3.77 molecules cm <sup>-3</sup>                      |                           |
| Reactions Contributing to Acetaldehyde (CCHO) Loss                   |                                                                         |                                                        |                           |
| No.                                                                  | Reaction                                                                | Integrated Reaction Rate (molecules cm <sup>-3</sup> ) | Percent of Loss (%)       |
| 1                                                                    | OH + CCHO → Products                                                    | 1.47                                                   | 81.6                      |
| 2                                                                    | CCHO + hv → Products                                                    | 0.308                                                  | 17.1                      |
| 3                                                                    | NO <sub>3</sub> + CCHO → Products                                       | 0.0247                                                 | 1.37                      |
|                                                                      | Total Loss                                                              | = 1.80 molecules cm <sup>-3</sup>                      |                           |
| Top 5 Reactions Contributing to Methacrolein (MACR) Production       |                                                                         |                                                        |                           |
| No.                                                                  | Reaction                                                                | Integrated Reaction Rate (molecules cm <sup>-3</sup> ) | Percent of Production (%) |
| 1                                                                    | Emis → MACR                                                             | 1.02                                                   | 99.8                      |
| 2                                                                    | NO + xMACR → MACR + Products                                            | 0.00215                                                | 0.210                     |
| 3                                                                    | AFG3 ( Aromatic dicarbonyl fragment) + O <sub>3</sub> → MACR + Products | 0.000187                                               | 0.0183                    |
| 4                                                                    | NO <sub>3</sub> + xMACR → MACR + Products                               | 1.20 × 10 <sup>-5</sup>                                | 0.00117                   |
| 5                                                                    | MECO <sub>3</sub> + xMACR → MACR + Products                             | 4.45 × 10 <sup>-6</sup>                                | 0.000434                  |
|                                                                      | Total Production                                                        | = 1.03 molecules cm <sup>-3</sup>                      |                           |
| Top 5 Reactions Contributing to Methacrolein (MACR) Loss             |                                                                         |                                                        |                           |
| No.                                                                  | Reaction                                                                | Integrated Reaction Rate (molecules cm <sup>-3</sup> ) | Percent of Loss (%)       |
| 1                                                                    | MACR + OH → Products                                                    | 0.513                                                  | 76.7                      |
| 2                                                                    | MACR + hv → Products                                                    | 0.0809                                                 | 12.1                      |
| 3                                                                    | MACR + O <sub>3</sub> → Products                                        | 0.0678                                                 | 10.1                      |
| 4                                                                    | MACR + NO <sub>3</sub> → Products                                       | 0.00551                                                | 0.823                     |
| 5                                                                    | MACR + O <sup>3</sup> P → Products                                      | 0.00158                                                | 0.236                     |
|                                                                      | Total Loss                                                              | = 0.670 molecules cm <sup>-3</sup>                     |                           |
| Top 5 Reactions Contributing to Benzaldehyde (BALD) Production       |                                                                         |                                                        |                           |
| No.                                                                  | Reaction                                                                | Integrated Reaction Rate (molecules cm <sup>-3</sup> ) | Percent of Production (%) |
| 1                                                                    | Emis → BALD                                                             | 1.50                                                   | 98.8                      |
| 2                                                                    | NO + xBALD → BALD + Products                                            | 0.0183                                                 | 1.20                      |
| 3                                                                    | NO <sub>3</sub> + xBALD → BALD + Products                               | 0.000100                                               | 0.00660                   |
| 4                                                                    | MECO <sub>3</sub> + xBALD → BALD + Products                             | 3.84 × 10 <sup>-5</sup>                                | 0.00252                   |
| 5                                                                    | RCO <sub>3</sub> + xBALD → BALD + Products                              | 1.38 × 10 <sup>-5</sup>                                | 0.000905                  |
|                                                                      | Total Production                                                        | = 1.52 molecules cm <sup>-3</sup>                      |                           |
| Reactions Contributing to Benzaldehyde (BALD) Loss                   |                                                                         |                                                        |                           |
| No.                                                                  | Reaction                                                                | Integrated Reaction Rate (molecules cm <sup>-3</sup> ) | Percent of Loss (%)       |
| 1                                                                    | OH + BALD → Products                                                    | 0.515                                                  | 97.0                      |
| 2                                                                    | NO <sub>3</sub> + BALD → Products                                       | 0.0119                                                 | 2.25                      |
| 3                                                                    | BALD + hv → Products                                                    | 0.00379                                                | 0.714                     |
|                                                                      | Total Loss                                                              | = 0.530 molecules cm <sup>-3</sup>                     |                           |
| Top 5 Reactions Contributing to Methyl Ethyl Ketone (MEK) Production |                                                                         |                                                        |                           |

| No.                                                      | Reaction                                    | Integrated Reaction Rate<br>(molecules cm <sup>-3</sup> ) | Percent of Production<br>(%) |
|----------------------------------------------------------|---------------------------------------------|-----------------------------------------------------------|------------------------------|
| 1                                                        | NO + xMEK → MEK + Products                  | 1.43                                                      | 98.1                         |
| 2                                                        | RNO <sub>3</sub> + hv → 0.12 MEK + Products | 0.00908                                                   | 0.623                        |
| 3                                                        | NO <sub>3</sub> + xMEK → MEK + Products     | 0.00772                                                   | 0.530                        |
| 4                                                        | MECO <sub>3</sub> + xMEK → MEK + Products   | 0.00294                                                   | 0.202                        |
| 5                                                        | RNO <sub>3</sub> + OH → 0.01 MEK + Products | 0.00287                                                   | 0.197                        |
|                                                          | Total Production                            | = 1.46 molecules cm <sup>-3</sup>                         |                              |
| Reactions Contributing to Methyl Ethyl Ketone (MEK) Loss |                                             |                                                           |                              |
| No.                                                      | Reaction                                    | Integrated Reaction Rate<br>(molecules cm <sup>-3</sup> ) | Percent of Loss (%)          |
| 1                                                        | MEK + OH → Products                         | 0.0507                                                    | 63.5                         |
| 2                                                        | MEK + hv → Products                         | 0.0291                                                    | 36.5                         |
|                                                          | Total Production                            | = 0.0800 molecules cm <sup>-3</sup>                       |                              |

**Table S10.3: Carbonyl Production and Loss Budget on Day 4 (RACM2 Output)**

| Top 5 Reactions Contributing to Formaldehyde (HCHO) Production |                                                                            |                                                           |                              |
|----------------------------------------------------------------|----------------------------------------------------------------------------|-----------------------------------------------------------|------------------------------|
| No.                                                            | Reaction                                                                   | Integrated Reaction Rate<br>(molecules cm <sup>-3</sup> ) | Percent of Production<br>(%) |
| 1                                                              | MO2 (Methyl peroxy radical) + NO<br>→ HCHO + Products                      | 2.32                                                      | 59.8                         |
| 2                                                              | ETEP (Peroxy radicals formed from<br>ethene) + NO → 1.6 HCHO +<br>Products | 0.354                                                     | 9.10                         |
| 3                                                              | HKET → HCHO + Products                                                     | 0.328                                                     | 8.46                         |
| 4                                                              | MCP + NO → 0.5 HCHO + Products                                             | 0.173                                                     | 4.47                         |
| 5                                                              | OH + MOH → HCHO + Products                                                 | 0.165                                                     | 4.25                         |
|                                                                | Total Production                                                           | = 3.88 molecules cm <sup>-3</sup>                         |                              |
| Reactions Contributing to Formaldehyde (HCHO) Loss             |                                                                            |                                                           |                              |
| No.                                                            | Reaction                                                                   | Integrated Reaction Rate<br>(molecules cm <sup>-3</sup> ) | Percent of Loss (%)          |
| 1                                                              | HCHO → Products                                                            | 2.75                                                      | 89.8                         |
| 2                                                              | OH + HCHO → Products                                                       | 0.312                                                     | 10.2                         |
| 3                                                              | NO <sub>3</sub> + HCHO → Products                                          | 0.00160                                                   | 0.0521                       |
|                                                                | Total Loss                                                                 | = 3.06 molecules cm <sup>-3</sup>                         |                              |
|                                                                |                                                                            |                                                           |                              |
| Top 5 Reactions Contributing to Acetaldehyde (ACD) Production  |                                                                            |                                                           |                              |
| No.                                                            | Reaction                                                                   | Integrated Reaction Rate<br>(molecules cm <sup>-3</sup> ) | Percent of Production<br>(%) |
| 1                                                              | ETHP + NO → ACD + Products                                                 | 1.93                                                      | 48.0                         |
| 2                                                              | HC3P (Peroxy radicals) + NO →<br>ACD + Products                            | 1.92                                                      | 47.9                         |
| 3                                                              | HC5P (Peroxy radicals) + NO →<br>ACD + Products                            | 0.12                                                      | 3.00                         |
| 4                                                              | OH + EOH → ACD + Products                                                  | 0.0176                                                    | 0.438                        |
| 5                                                              | OH + ROH → 0.18 ACD + Products                                             | 0.0110                                                    | 0.273                        |
|                                                                | Total Production                                                           | = 4.02 molecules cm <sup>-3</sup>                         |                              |
| Reactions Contributing to Acetaldehyde (ACD) Loss              |                                                                            |                                                           |                              |
| No.                                                            | Reaction                                                                   | Integrated Reaction Rate<br>(molecules cm <sup>-3</sup> ) | Percent of Loss (%)          |
| 1                                                              | OH + ACD → Products                                                        | 1.53                                                      | 81.5                         |
| 2                                                              | ACD → Products                                                             | 0.325                                                     | 17.3                         |

|                                                                      |                                                                                                                    |                                                           |                              |
|----------------------------------------------------------------------|--------------------------------------------------------------------------------------------------------------------|-----------------------------------------------------------|------------------------------|
| 3                                                                    | $\text{NO}_3 + \text{ACD} \rightarrow \text{Products}$                                                             | 0.0221                                                    | 1.18                         |
|                                                                      | Total Loss                                                                                                         | $= 1.88 \text{ molecules cm}^{-3}$                        |                              |
| Reaction Contributing to Methacrolein (MACR) Production              |                                                                                                                    |                                                           |                              |
| No.                                                                  | Reaction                                                                                                           | Integrated Reaction Rate<br>(molecules $\text{cm}^{-3}$ ) | Percent of Production<br>(%) |
| 1                                                                    | $\text{Emis} \rightarrow \text{MACR}$                                                                              | 1.78                                                      | 100                          |
|                                                                      | Total Production                                                                                                   | $= 1.78 \text{ molecules cm}^{-3}$                        |                              |
| Top 5 Reactions Contributing to Methacrolein (MACR) Loss             |                                                                                                                    |                                                           |                              |
| No.                                                                  | Reaction                                                                                                           | Integrated Reaction Rate<br>(molecules $\text{cm}^{-3}$ ) | Percent of Loss (%)          |
| 1                                                                    | $\text{MACR} + \text{OH} \rightarrow \text{Products}$                                                              | 0.513                                                     | 76.721                       |
| 2                                                                    | $\text{MACR} \rightarrow \text{Products}$                                                                          | 0.0809                                                    | 12.1                         |
| 3                                                                    | $\text{MACR} + \text{O}_3 \rightarrow \text{Products}$                                                             | 0.0678                                                    | 10.1                         |
| 4                                                                    | $\text{MACR} + \text{NO}_3 \rightarrow \text{Products}$                                                            | 0.00551                                                   | 0.823                        |
|                                                                      | Total Loss                                                                                                         | $= 1.10 \text{ molecules cm}^{-3}$                        |                              |
| Top 5 Reactions Contributing to Benzaldehyde (BALD) Production       |                                                                                                                    |                                                           |                              |
| No.                                                                  | Reaction                                                                                                           | Integrated Reaction Rate<br>(molecules $\text{cm}^{-3}$ ) | Percent of Production<br>(%) |
| 1                                                                    | $\text{EPX (Epoxide)} + \text{O}_3 \rightarrow \text{BALD} + \text{Products}$                                      | 0.107                                                     | 72.1                         |
| 2                                                                    | $\text{PER1 (Peroxy intermediate formed from toluene)} + \text{NO} \rightarrow 0.5 \text{ BALD} + \text{Products}$ | 0.0199                                                    | 13.4                         |
| 3                                                                    | $\text{TLP1 (Peroxy radicals)} + \text{NO} \rightarrow \text{BALD} + \text{Products}$                              | 0.0103                                                    | 6.90                         |
| 4                                                                    | $\text{XYL1 (Peroxy radicals)} + \text{NO} \rightarrow \text{BALD} + \text{Products}$                              | 0.00945                                                   | 6.36                         |
| 5                                                                    | $\text{OLT (Terminal alkenes)} + \text{O}_3 \rightarrow \text{BALD} + \text{Products}$                             | 0.00169                                                   | 1.14                         |
|                                                                      | Total Production                                                                                                   | $= 0.150 \text{ molecules cm}^{-3}$                       |                              |
| Reactions Contributing to Benzaldehyde (BALD) Loss                   |                                                                                                                    |                                                           |                              |
| No.                                                                  | Reaction                                                                                                           | Integrated Reaction Rate<br>(molecules $\text{cm}^{-3}$ ) | Percent of Loss (%)          |
| 1                                                                    | $\text{OH} + \text{BALD} \rightarrow \text{Products}$                                                              | 0.0810                                                    | 89.9                         |
| 2                                                                    | $\text{BALD} \rightarrow \text{HO}_2 + \text{Products}$                                                            | 0.00913                                                   | 10.1                         |
|                                                                      | Total Loss                                                                                                         | $= 0.0900 \text{ molecules cm}^{-3}$                      |                              |
| Top 5 Reactions Contributing to Methyl Ethyl Ketone (MEK) Production |                                                                                                                    |                                                           |                              |
| No.                                                                  | Reaction                                                                                                           | Integrated Reaction Rate<br>(molecules $\text{cm}^{-3}$ ) | Percent of Production<br>(%) |
| 1                                                                    | $\text{HC3P} + \text{NO} \rightarrow \text{MEK} + \text{Products}$                                                 | 0.160                                                     | 60.5                         |
| 2                                                                    | $\text{HC5P} + \text{NO} \rightarrow \text{MEK} + \text{Products}$                                                 | 0.0883                                                    | 33.3                         |
| 3                                                                    | $\text{OLTP} + \text{NO} \rightarrow \text{MEK} + \text{Products}$                                                 | 0.00901                                                   | 3.40                         |
| 4                                                                    | $\text{OLT} + \text{O}_3 \rightarrow \text{MEK} + \text{Products}$                                                 | 0.00507                                                   | 1.91                         |
| 5                                                                    | $\text{DCB2 (Unsaturated dicarbonyl)} + \text{OH} \rightarrow \text{MEK} + \text{Products}$                        | 0.00106                                                   | 0.399                        |
|                                                                      | Total Production                                                                                                   | $= 0.270 \text{ molecules cm}^{-3}$                       |                              |
| Reactions Contributing to Methyl Ethyl Ketone (MEK) Loss             |                                                                                                                    |                                                           |                              |
| No.                                                                  | Reaction                                                                                                           | Integrated Reaction Rate<br>(molecules $\text{cm}^{-3}$ ) | Percent of Loss (%)          |
| 1                                                                    | $\text{MEK} \rightarrow \text{Products}$                                                                           | 0.0285                                                    | 72.6                         |

|   |                     |                                    |      |
|---|---------------------|------------------------------------|------|
| 2 | MEK + OH → Products | 0.0108                             | 27.4 |
|   | Total Production    | = 0.040 molecules cm <sup>-3</sup> |      |

**Table S10.4: Carbonyl Production and Loss Budget on Day 4 (CB6 Output)**

| Top 5 Reactions Contributing to Formaldehyde (FORM) Production                                     |                                                     |                                                        |                           |
|----------------------------------------------------------------------------------------------------|-----------------------------------------------------|--------------------------------------------------------|---------------------------|
| No.                                                                                                | Reaction                                            | Integrated Reaction Rate (molecules cm <sup>-3</sup> ) | Percent of Production (%) |
| 1                                                                                                  | MEO2 (Methyl peroxy radical) + NO → FORM + Products | 1.54                                                   | 36.0                      |
| 2                                                                                                  | HCO3 (Formyl peroxy radical) → FORM + Products      | 1.12                                                   | 26.2                      |
| 3                                                                                                  | OH + ETH → 1.56 FORM + Products                     | 0.500                                                  | 11.7                      |
| 4                                                                                                  | OH + OLE → 0.78 FORM + Products                     | 0.335                                                  | 7.83                      |
| 5                                                                                                  | MEOH (Methanol) + OH → FORM + Products              | 0.263                                                  | 6.14                      |
|                                                                                                    | Total Production                                    | = 4.28 molecules cm <sup>-3</sup>                      |                           |
| Reactions Contributing to Formaldehyde (FORM) Loss                                                 |                                                     |                                                        |                           |
| No.                                                                                                | Reaction                                            | Integrated Reaction Rate (molecules cm <sup>-3</sup> ) | Percent of Loss (%)       |
| 1                                                                                                  | FORM → Products                                     | 2.14                                                   | 58.39                     |
| 2                                                                                                  | FORM + HO <sub>2</sub> → Products                   | 1.13                                                   | 30.76                     |
| 3                                                                                                  | FORM + OH → Products                                | 0.393                                                  | 10.74                     |
| 4                                                                                                  | FORM + NO <sub>3</sub> → Products                   | 0.00401                                                | 0.110                     |
| 5                                                                                                  | FORM + O <sup>3</sup> P → Products                  | 4.09 × 10 <sup>-5</sup>                                | 0.00112                   |
|                                                                                                    | Total Loss                                          | = 3.66 molecules cm <sup>-3</sup>                      |                           |
| Top 5 Reactions Contributing to Acetaldehyde (ALD2) Production                                     |                                                     |                                                        |                           |
| No.                                                                                                | Reaction                                            | Integrated Reaction Rate (molecules cm <sup>-3</sup> ) | Percent of Production (%) |
| 1                                                                                                  | OH + ETHA → 0.991 ALD2 + Products                   | 0.668                                                  | 23.3                      |
| 2                                                                                                  | CXO3 (Acyl peroxy radical) + NO → ALD2 + Products   | 0.536                                                  | 18.7                      |
| 3                                                                                                  | KET → 0.58 ALD2 + Products                          | 0.479                                                  | 16.7                      |
| 4                                                                                                  | ROR → 0.74 ALD2 + Products                          | 0.385                                                  | 13.4                      |
| 5                                                                                                  | ALDX → ALD2 + Products                              | 0.260                                                  | 9.07                      |
|                                                                                                    | Total Production                                    | = 2.86 molecules cm <sup>-3</sup>                      |                           |
| Reactions Contributing to Acetaldehyde (ALD2) Loss                                                 |                                                     |                                                        |                           |
| No.                                                                                                | Reaction                                            | Integrated Reaction Rate (molecules cm <sup>-3</sup> ) | Percent of Loss (%)       |
| 1                                                                                                  | ALD2 + OH → Products                                | 1.39                                                   | 87.2                      |
| 2                                                                                                  | ALD2 → Products                                     | 0.188                                                  | 11.7                      |
| 3                                                                                                  | ALD2 + NO <sub>3</sub> → Products                   | 0.0162                                                 | 1.01                      |
| 4                                                                                                  | ALD2 + O <sup>3</sup> P → Products                  | 0.000264                                               | 0.0165                    |
|                                                                                                    | Total Loss                                          | = 1.60 molecules cm <sup>-3</sup>                      |                           |
| Top 5 Reactions Contributing to the Production of Aldehydes with Three or More Carbon Atoms (ALDX) |                                                     |                                                        |                           |
| No.                                                                                                | Reaction                                            | Integrated Reaction Rate (molecules cm <sup>-3</sup> ) | Percent of Production (%) |
| 1                                                                                                  | OH + PAR → 0.11 ALDX + Products                     | 1.18                                                   | 48.1                      |

|                                                                                        |                                                    |                                                        |                           |
|----------------------------------------------------------------------------------------|----------------------------------------------------|--------------------------------------------------------|---------------------------|
| 2                                                                                      | OH + PRPA (Propionaldehyde) → 0.26 ALDX + Products | 0.467                                                  | 19.1                      |
| 3                                                                                      | KET → 0.58 ALD2 + Products                         | 0.281                                                  | 11.5                      |
| 4                                                                                      | OH + OLE → 0.488 ALDX + Products                   | 0.210                                                  | 8.57                      |
| 5                                                                                      | ROR (Alkoxy radical) → 0.37 ALDX + Products        | 0.192                                                  | 7.87                      |
|                                                                                        | Total Production                                   | = 2.44 molecules cm <sup>-3</sup>                      |                           |
| Reactions Contributing to the Loss of Aldehydes with Three or More Carbon Atoms (ALDX) |                                                    |                                                        |                           |
| No.                                                                                    | Reaction                                           | Integrated Reaction Rate (molecules cm <sup>-3</sup> ) | Percent of Loss (%)       |
| 1                                                                                      | ALDX + OH → Products                               | 1.31                                                   | 80.3                      |
| 2                                                                                      | ALDX → Products                                    | 0.260                                                  | 15.9                      |
| 3                                                                                      | ALDX + NO <sub>3</sub> → Products                  | 0.0610                                                 | 3.74                      |
| 4                                                                                      | ALDX + O <sup>3</sup> P → Products                 | 0.000324                                               | 0.0198                    |
|                                                                                        | Total Loss                                         | = 1.63 molecules cm <sup>-3</sup>                      |                           |
|                                                                                        |                                                    |                                                        |                           |
| Top 5 Reactions Contributing to Ketone Species (KET) Production                        |                                                    |                                                        |                           |
| No.                                                                                    | Reaction                                           | Integrated Reaction Rate (molecules cm <sup>-3</sup> ) | Percent of Production (%) |
| 1                                                                                      | ROR → KET + Products                               | 7.62                                                   | 98.7                      |
| 2                                                                                      | ROR → 0.2 KET + Products                           | 0.104                                                  | 1.35                      |
|                                                                                        | Total Production                                   | = 7.72 molecules cm <sup>-3</sup>                      |                           |
| Reactions Contributing to Ketone Species (KET) Loss                                    |                                                    |                                                        |                           |
| No.                                                                                    | Reaction                                           | Integrated Reaction Rate (molecules cm <sup>-3</sup> ) | Percent of Loss (%)       |
| 1                                                                                      | KET → Products                                     | 0.827                                                  | 100                       |
|                                                                                        | Total Loss                                         | = 0.827 molecules cm <sup>-3</sup>                     |                           |
